# Supplementary material
Source: PubMed Central journal article supplement (PMC3744513)
Supplement: gmic-4-281-s01.pdf [file gmic-4-281-s01.pdf]

## **Supplemental Material to:**

**Cassandra W. Philipson, Josep Bassaganya-Riera and  
Raquel Hontecillas**

**Animal models of enteroaggregative *Escherichia coli*  
infection**

**Gut Microbes 2013; 4(4)**

**<http://dx.doi.org/10.4161/gmic.24826>**

**[http://www.landesbioscience.com/journals/gutmicrobes/  
article/24826/](http://www.landesbioscience.com/journals/gutmicrobes/article/24826/)**

# Animal Models of Enteroaggregative *Escherichia coli* Infection

Casandra W Philipson\*<sup>‡</sup>, Josep Bassaganya-Riera\*<sup>‡§</sup>, and Raquel Hontecillas\*<sup>‡</sup>

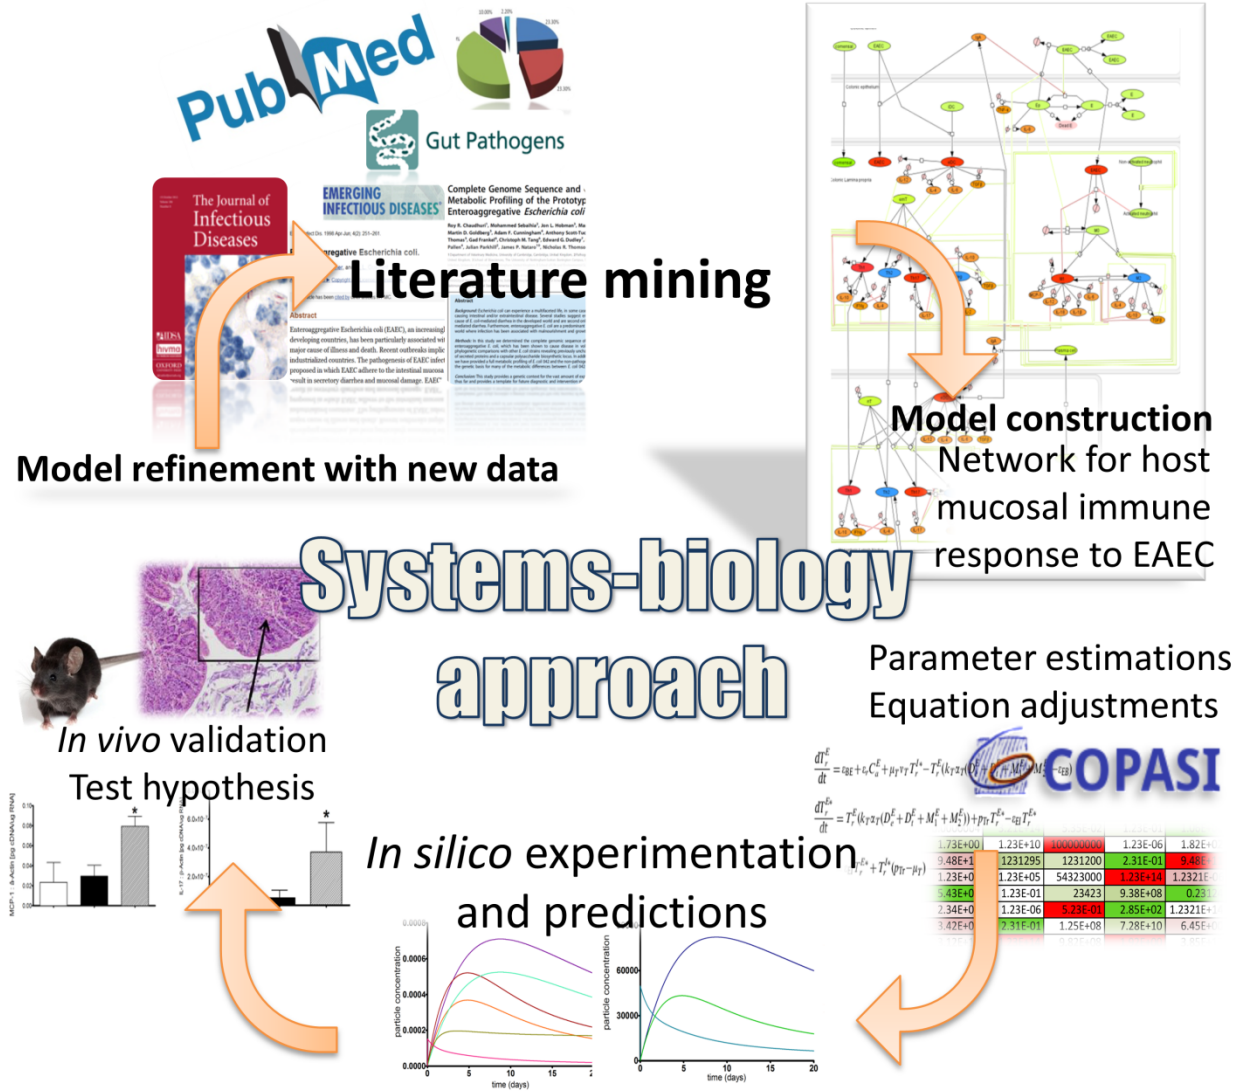

**Supplementary Figure 1: The process of a systems biology approach to study host response to enteroaggregative *Escherichia coli* (EAEC).** The systems biology approach used to develop, test, and refine computational models is a cyclical process that incorporates data from multiple

disciplines to provide a more holistic overview of host responses to pathogen. In depth literature mining for qualitative and quantitative data lays the foundation for known mechanisms of host-pathogen interaction. Pathways of interest are incorporated into a visual design using Systems Biology Markup Language (SBML) software. The SBML structure is then fully integrated into a program capable of simulating the dynamic processes in the network such as the COmplex PATHway SIMulator (COPASI) application. The kinetics in the computational model are calibrated using a database of compiled data and *in silico* experimentation takes place to form predictions. Lab experiments are performed to validate computational hypotheses and provide information that promotes re-shaping and re-calibrating the network.

Supplementary Figure 2.

Ordinary differential equations from EAEC T cell differentiation model

$$\begin{aligned} \frac{d([Treg])}{dt} &= -V_{colon} \cdot (K1_{(re17)} \cdot [Treg]) \\ &\quad + ([emT] \cdot (K1_{(re21)} \cdot [TGF\beta] + K2_{(re21)} \cdot [IL10])) \\ &\quad + V_{colon} \cdot ([nt] \cdot (K1_{(re7)}) \cdot [EAEC]) \\ \frac{d([Th17])}{dt} &= -V_{colon} \cdot (K1_{(re16)} \cdot [Th17]) \\ &\quad + ([emT] \cdot (K1_{(re9)} \cdot [IL6] + K2_{(re9)} \cdot [TGF\beta] + K3_{(re9)} \cdot [IL17])) \\ &\quad + V_{colon} \cdot ([nt] \cdot K1_{(re7)}) \cdot [EAEC] \\ \frac{d([Th1])}{dt} &= -V_{colon} \cdot (K1_{(re16)} \cdot [Th1]) \\ &\quad + ([emT] \cdot (K1_{(re20)} \cdot [IFN\gamma] + K2_{(re20)} \cdot [TNF\alpha])) \\ &\quad + V_{colon} \cdot ([nt] \cdot K1_{(re8)}) \cdot [EAEC] \\ \frac{d([EAEC])}{dt} &= -V_{colon} \cdot ([EAEC] \cdot K1_{(re22)} \cdot [Th1] + K2_{(re22)} \cdot [Th17]) \\ \frac{d([TNF\alpha])}{dt} &= -V_{colon} \cdot (K1_{(re18)} \cdot [TNF\alpha]) \\ &\quad + V_{colon} \cdot ([pTNF\alpha] \cdot K1_{(re5)}) \cdot [Th1] \\ \frac{d([TGF\beta])}{dt} &= -V_{colon} \cdot (K1_{(re14)} \cdot [TGF\beta]) \\ &\quad + V_{colon} \cdot ([pTGF\beta] \cdot K1_{(re4)}) \cdot [Treg] \\ \frac{d([IL6])}{dt} &= -V_{colon} \cdot (K1_{(re13)} \cdot [IL6]) \\ &\quad + (([pIL6] \cdot K1_{(re19)}) \cdot [Th17] + K2_{(re19)} \cdot [External_Source]) \\ \frac{d([IL17])}{dt} &= -V_{colon} \cdot (K1_{(re12)} \cdot [IL17]) \\ &\quad + V_{colon} \cdot ([pIL17] \cdot K1_{(re3)}) \cdot [Th17] \\ \frac{d([IL10])}{dt} &= -V_{colon} \cdot (K1_{(re11)} \cdot [IL10]) \\ &\quad + V_{colon} \cdot ([pIL17] \cdot K1_{(re2)}) \cdot [Treg] \\ \frac{d([IFN\gamma])}{dt} &= -V_{colon} \cdot (K1_{(re10)} \cdot [IFN\gamma]) \\ &\quad + V_{colon} \cdot ([pIFN\gamma] \cdot K1_{(re1)}) \cdot [Th1] \\ \frac{d([emT])}{dt} &= -([emT] \cdot (K1_{(re20)} \cdot [IFN\gamma] + K2_{(re20)} \cdot [TNF\alpha])) \\ &\quad - ([emT] \cdot (K1_{(re21)} \cdot [TGF\beta] + K2_{(re21)} \cdot [IL10])) \\ &\quad - ([emT] \cdot (K1_{(re9)} \cdot [IL6] + K2_{(re9)} \cdot [TGF\beta] + K3_{(re9)} \cdot [IL17])) \end{aligned}$$

**Supplementary Figure 2: Ordinary Differential Equations (ODE) based on mass action used for EAEC T cell differentiation model.**

| Calibration Data - EAEC T cell Differentiation Model - October 2012 |             |             |             |             |             |                         |                     |                                         |                     |                    |                    |
|---------------------------------------------------------------------|-------------|-------------|-------------|-------------|-------------|-------------------------|---------------------|-----------------------------------------|---------------------|--------------------|--------------------|
| Normalized Gene Expression Data                                     |             |             |             |             |             | Bacterial Load in Feces |                     | T cell populations using Flow Cytometry |                     |                    |                    |
| time                                                                | Norm-TGFb   | Norm-TNFa   | Norm-IL6    | Norm-IL17   | Norm-IL10   | time                    | EAEC quantification | time                                    | IL17 producing Th17 | IFNg producing Th1 | Regulatory T cells |
| 5                                                                   | 0.205190451 | 0.374654445 | 0.820866897 | 1.878670704 | 1.44011E-05 | 3                       | 7123.13             | 14                                      | 90888.75            | 145422             | 327199.5           |
| 5                                                                   | 0.526565841 | 0.41259717  | 0.376248029 | 0           | 4.87187E-06 | 3                       | 8110.87             | 14                                      | 92340               | 295488             | 203148             |
| 5                                                                   | 0.465335146 | 1.145038168 | 1.492019431 | 0           | 0.137570238 | 3                       | 7029.98             | 14                                      | 65667.6             | 98816.64           | 86464.56           |
| 5                                                                   | 1.073833295 | 1.051633869 | 0.60447406  | 0           | 0.003045569 | 3                       | 9648.13             | 14                                      | 38165.85            | 45002.25           | 64881.945          |
| 5                                                                   | 0.587212221 | 0.52507837  | 0.604338843 | 0           | 0.829391165 | 3                       | 6342.8              | 14                                      | 103774.65           | 42936.39           | 45900              |
| 5                                                                   | 0.35608655  | 0.17683466  | 0.870331219 | 0           | 0.357856336 | 3                       | 7262.77             | 14                                      | 65667.6             | 34765.2            | 38628              |
| 5                                                                   | 1.022087714 | 0.181407061 | 0.177892283 | 0           | 0.004055527 | 3                       | 5831.49             | 14                                      | 56359.8             | 61065.36           | 31311              |
| 5                                                                   | 0.17608563  | 0.931218883 | 0.172063406 | 0           | 0.016478982 | 3                       | 8028.2              | 14                                      | 73266.32143         | 103356.5486        | 113933.2864        |
| 5                                                                   | 0.182206071 | 2.343260188 | 0.802139037 | 0           | 0.014879453 | 5                       | 16698.6             |                                         |                     |                    |                    |
| 5                                                                   | 0.531096623 | 2.293428757 | 3.946280992 | 0           | 0.000569899 | 5                       | 13815.5             |                                         |                     |                    |                    |
| 5                                                                   | 2.552926526 | 1.282007511 | 1.66380789  | 0           | 0.013008361 | 5                       | 16768.1             |                                         |                     |                    |                    |
| 5                                                                   | 1.101705867 | 1.427343333 | 0.81500049  | 0           |             | 5                       | 14192.1             |                                         |                     |                    |                    |
| 5                                                                   | 0.662198985 | 1.466108149 | 2.803837412 | 1.280517645 |             | 5                       | 11000.9             |                                         |                     |                    |                    |
| 5                                                                   | 0.579466818 | 5.813574779 | 0.339358228 |             |             | 5                       | 10120.7             |                                         |                     |                    |                    |
| 5                                                                   | 0.550580086 | 0.870837084 | 1.16305796  |             |             | 10                      | 1.02E+04            |                                         |                     |                    |                    |
| 5                                                                   | 0.550884582 | 1.036887225 | 0.378741353 |             |             | 10                      | 10220               |                                         |                     |                    |                    |
| 5                                                                   | 0.822758269 | 1.697312588 | 0.661226813 |             |             | 10                      | 9114.777778         |                                         |                     |                    |                    |
| 5                                                                   | 0.649684972 | 3.618982588 | 2.164318271 |             |             | 10                      | 8178.14             |                                         |                     |                    |                    |
| 5                                                                   | 0.749999157 | 1.268701464 | 1.781327033 |             |             | 10                      | 6826.2              |                                         |                     |                    |                    |
| 5                                                                   | 0.999845357 | 1.775204201 | 1.883884461 |             |             | 10                      | 9120.777778         |                                         |                     |                    |                    |
| 5                                                                   | 1.043476697 | 3.076379066 | 1.732616619 |             |             |                         |                     |                                         |                     |                    |                    |
| 5                                                                   | 0.995644949 | 2.062706271 | 0.950616517 |             |             |                         |                     |                                         |                     |                    |                    |
| 5                                                                   | 0.754005154 | 6.915222772 | 0.326008447 |             |             |                         |                     |                                         |                     |                    |                    |
| 5                                                                   | 0.832142205 | 1.220192442 |             |             |             |                         |                     |                                         |                     |                    |                    |
| 5                                                                   | 0.783040843 | 1.473058617 |             |             |             |                         |                     |                                         |                     |                    |                    |
| 14                                                                  | 3.323645577 | 1.271855716 | 0           | 0           | 0.769328586 |                         |                     |                                         |                     |                    |                    |
| 14                                                                  | 1.549814541 | 2.490916045 | 0           | 0           | 5.4518E-05  |                         |                     |                                         |                     |                    |                    |
| 14                                                                  | 2.391109205 | 0.620089052 | 0           | 0           | 0.043069344 |                         |                     |                                         |                     |                    |                    |
| 14                                                                  | 1.237172033 | 0.224655528 | 0           | 0           | 0.010619868 |                         |                     |                                         |                     |                    |                    |
| 14                                                                  | 1.631424506 | 0.527973965 | 1.467541436 | 0           | 1.99672E-05 |                         |                     |                                         |                     |                    |                    |
| 14                                                                  | 1.370921409 | 0.790820185 | 1.910007298 | 0           | 1.91688E-07 |                         |                     |                                         |                     |                    |                    |
| 14                                                                  | 1.47675425  | 0.502008032 | 2.092050209 | 0           | 0.001411834 |                         |                     |                                         |                     |                    |                    |
| 14                                                                  | 1.490453095 | 1.161671479 | 0           | 0           |             |                         |                     |                                         |                     |                    |                    |
| 14                                                                  | 1.47003875  | 1.013559943 | 0           | 0           |             |                         |                     |                                         |                     |                    |                    |
| 14                                                                  |             | 1.38106705  | 0           | 0           |             |                         |                     |                                         |                     |                    |                    |
| 14                                                                  |             | 1.2359496   | 1.022357617 | 0           |             |                         |                     |                                         |                     |                    |                    |
| 14                                                                  |             | 2.354934095 | 0           | 0           |             |                         |                     |                                         |                     |                    |                    |
| 14                                                                  |             | 1.5631716   | 1.204546864 | 0           |             |                         |                     |                                         |                     |                    |                    |
| 14                                                                  |             | 1.551700312 | 1.415570407 | 0           |             |                         |                     |                                         |                     |                    |                    |
| 14                                                                  |             | 0.892955401 | 1.064278998 | 0           |             |                         |                     |                                         |                     |                    |                    |
| 14                                                                  |             |             | 1.623772618 | 0           |             |                         |                     |                                         |                     |                    |                    |

**Supplementary Figure 3: Calibration database used to estimate parameters in the EAEC T cell differentiation model.** In house data from malnourished EAEC JM221 infected mice were organized by quantitative gene expression, bacterial shedding, and flow cytometry data<sup>1</sup>. These were linked to model species and used as reference points for model calibration.

1. Philipson CW, Bassaganya-Riera J, Viladomiu M, Pedragosa M, Guerrant RL, Roche JK, et al. The role of peroxisome proliferator-activated receptor  $\gamma$  in immune responses to enteroaggregative Escherichia coli infection. PloS one In Press.
